## Supplementary Figure 1

### Workflow of the molecular analysis and typing results

#### Collection 1

112 samples of 64 patients, mainly returning travellers, including 24 longitudinal cases of chronic infections

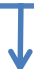

#### Collection 2

171 samples of 138 patients, returning travellers and autochthonous cases, including 23 longitudinal cases of chronic infections

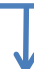

- 1) Assemblage specific PCR at single copy genes *TIF* and *CATH* to detect assemblage type A and B (199/283, 70.3%; CI 64.8-75.3%)
- 2) Common MLST typing scheme at loci *TPI* (198/283, 70.0%; CI 64.5-75.0%), *BG* (202/283, 71.4%; CI 65.9-76.3) and *GDH* (192/283, 67.8%; CI 62.2-73.0%); typing success at all 3 genes *TPI-BG-GDH* (161/283, 56.9%; CI 51.0-62.5%)
- 3) Assemblage A specific MLST typing scheme: Typing success at single genes: *HCMP22547* (33/69, 47.8%; CI 36.4-59.4%), *CID1* (35/69, 50.7%; CI 39.2-62.2%), *RHP26* (31/69, 44.9%; CI 33.8-56.6%), *HCMP6372* (34/69, 49.3%; CI 37.8-60.8%), *DIS3* (33/69, 47.8%; CI 36.5-59.4%) and *NEK15411* (33/69, 47.8%; CI 36.5-59.4%); typing success at all six loci (28/69, 40.6%; CI 29.8-52.4)

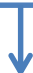

| Assemblage       | Collection 1<br>n=64 | Collection 2<br>n=138 | Autochthonous<br>n=76 | Travel-associated<br>n=109 |
|------------------|----------------------|-----------------------|-----------------------|----------------------------|
| Assemblage A     | 6                    | 19                    | 12                    | 10                         |
| Assemblage B     | 40                   | 75                    | 39                    | 70                         |
| Co-infection A/B | 14                   | 21                    | 11                    | 22                         |
| Not typeable     | 4                    | 23                    | 14                    | 7                          |

#### Collection 1

Concatinated sequences available for distance matrix analysis:

Assemblage A\* 8 samples (7 patients)  
Assemblage B 49 samples (34 patients)

#### Collection 2

Concatinated sequences available for distance matrix analysis:

Assemblage A\* 28 samples (24 patients)  
Assemblage B 66 samples (59 patients)

\* Includes samples of the common typing scheme and the assemblage A specific typing scheme. Note, the assemblage A specific typing scheme was also applied on samples of patients with assemblage A/B mixed infections to determine the assemblage A subtype in these samples. In the common MLST scheme 31 samples of 26 patients could be included and for the assemblage A specific scheme 28 samples of 22 patients could be included. Assemblage A samples of both collections were analyzed together.
